# Supplementary material for: Transmembrane coupling of liquid-like protein condensates
Source: Springer Nature journal article supplement (doi:10.1038/s41467-023-43332-w), 2023-12-04
Supplement: MOESM1 [file 41467_2023_43332_MOESM1_ESM.pdf]

## Supplementary Information

### Transmembrane coupling of liquid-like protein condensates

Yohan Lee<sup>1§</sup>, Sujin Park<sup>2§</sup>, Feng Yuan<sup>1</sup>, Carl C. Hayden<sup>1</sup>, Liping Wang<sup>3</sup>, Eileen M. Lafer<sup>3</sup>, Siyoung Q. Choi<sup>2</sup> and Jeanne C. Stachowiak<sup>1,4\*</sup>

<sup>1</sup>Department of Biomedical Engineering, The University of Texas at Austin, Austin, TX, USA.

<sup>2</sup>Department of Chemical and Biomolecular Engineering, Korea Advanced Institute of Science and Technology (KAIST), Daejeon, Republic of Korea.

<sup>3</sup>Department of Biochemistry and Structural Biology, The University of Texas Health Science Center at San Antonio, San Antonio, TX, USA.

<sup>4</sup>Department of Chemical Engineering, The University of Texas at Austin, Austin, TX, USA.

§These authors contributed equally.

\*To whom correspondence should be addressed: [jcstach@austin.utexas.edu](mailto:jcstach@austin.utexas.edu)

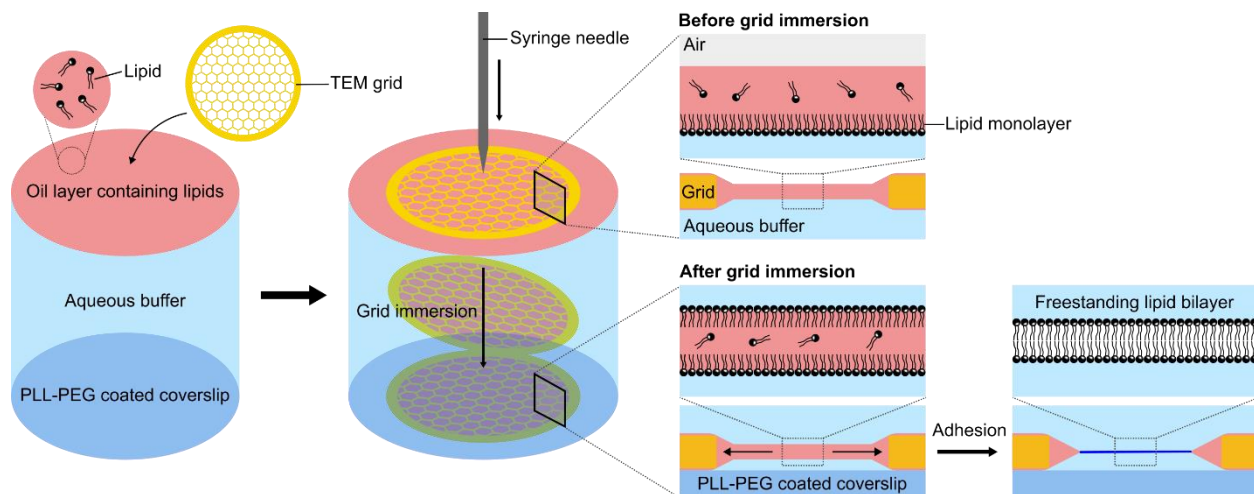

**Supplementary Figure 1. Schematic of freestanding planar lipid bilayer formation.** Initially, a TEM grid with hexagonal holes was placed onto an oil layer containing lipids, leading to the formation of a thin oil film within each grid hole with a lipid monolayer at the oil/buffer interface (before grid immersion). Next, the grid was immersed into the aqueous buffer using a syringe needle. Then, another lipid monolayer was formed at the oil/buffer interface. As the oil film in the grid hole became thinner, owing to oil draining back to the grid, spontaneous adhesion between the two lipid monolayers occurred, leading to a freestanding lipid bilayer (After grid immersion).

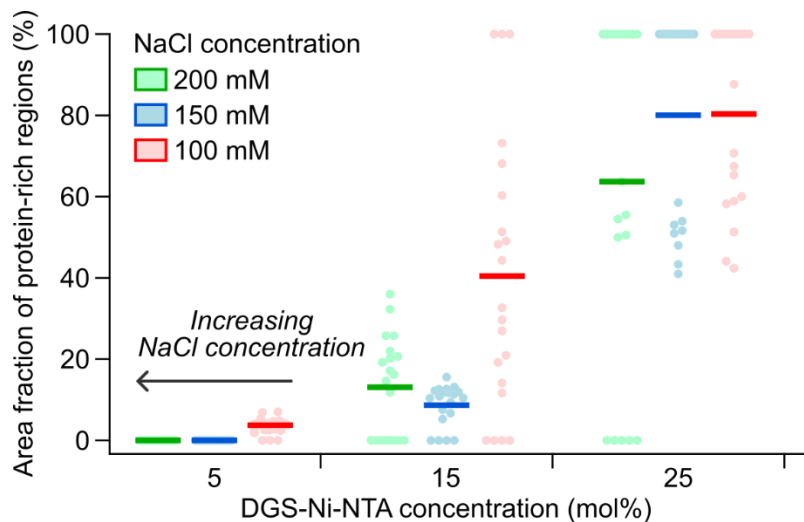

**Supplementary Figure 2. Area fraction of protein-rich regions as a function of NaCl concentration and DGS-Ni-NTA concentration.** A total of 20 lipid membranes were analyzed from three independent experiments for each condition. Bars represent the average area fraction for each case. Membrane composition: 75-95 mol% DOPC, 5-25 mol% DGS-Ni-NTA. 1  $\mu$ M of his-RGG labeled with Atto 488 was used.

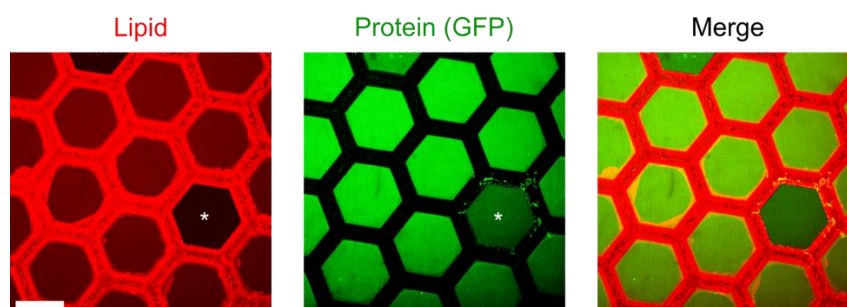

**Supplementary Figure 3. Homogeneous binding of GFP to freestanding planar membranes.** Representative microscopic images after adding 1  $\mu\text{M}$  of his-GFP to the membrane. Note that the fluorescence intensity of a vacant hole (marked with an asterisk) is weaker than the surrounding membranes in the lipid and protein channels. Membrane composition: 85 mol% DOPC, 15 mol% DGS-Ni-NTA, and 0.5 mol% Texas Red-DHPE. Buffer: 25 mM HEPES, 200 mM NaCl, pH 7.4. Scale bar, 100  $\mu\text{m}$ .

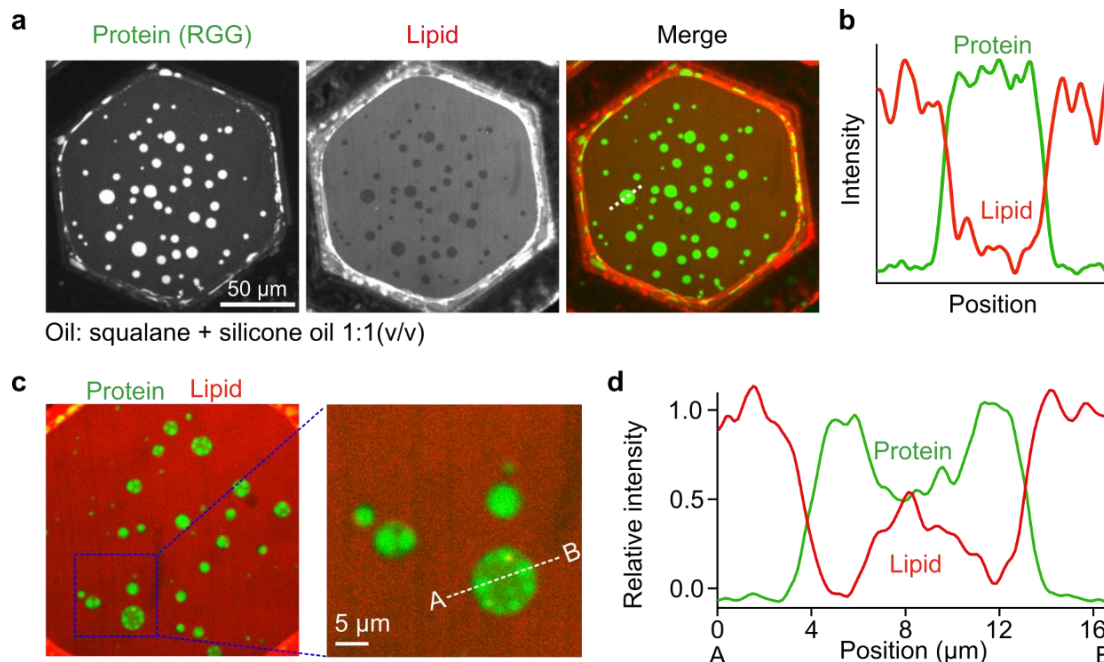

**Supplementary Figure 4. Lipid probe partitioning and transbilayer coupling of RGG condensates on solvent-free lipid membranes.** **a**, Representative images after adding 1  $\mu\text{M}$  of his-RGG, labeled with Atto 488, to the membrane. The membrane could be considered as having an essentially solvent-free hydrophobic core since squalane ( $\text{C}_{30}\text{H}_{62}$ ), a hydrocarbon with a bulky structure that does not easily enter the bilayers, was used instead of hexadecane ( $\text{C}_{16}\text{H}_{34}$ ). Scale bar, 50  $\mu\text{m}$ . **b**, Fluorescence intensity profile along the dotted white line in the merged channel in **a**, where green and red lines represent the intensity from the protein and lipid channels, respectively. **c**, Representative image showing transbilayer domain coupling. A region of interest within the blue dotted square is magnified. Scale bar, 5  $\mu\text{m}$ . **d**, Intensity profiles along the dotted white lines in the magnified image in **c**. Membrane composition: 85 mol% DOPC, 15 mol% DGS-Ni-NTA, and 0.5 mol% Texas Red-DHPE. Buffer: 25 mM HEPES, 100 mM NaCl, pH 7.4.

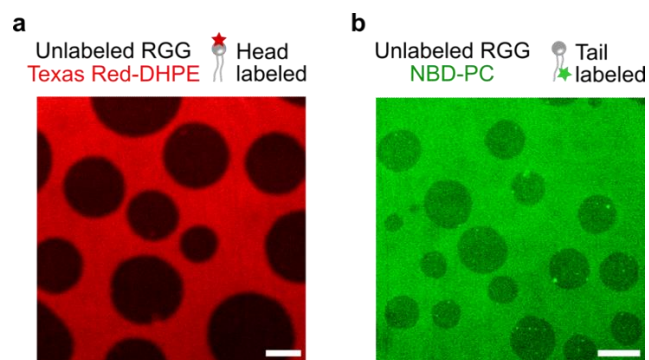

**Supplementary Figure 5. Lipid probe partitioning also occurs when condensates consist of unlabeled RGG.** Representative microscopic images in lipid probe channels, Texas Red-DHPE (a) and NBD-PC (b), after adding 1  $\mu$ M of unlabeled his-RGG. Membrane composition: 85 mol% DOPC, 15 mol% DGS-Ni-NTA and 0.5 mol% lipid probe. Buffer: 25 mM HEPES, 50-100 mM NaCl, pH 7.4. Scale bars, 10  $\mu$ m.

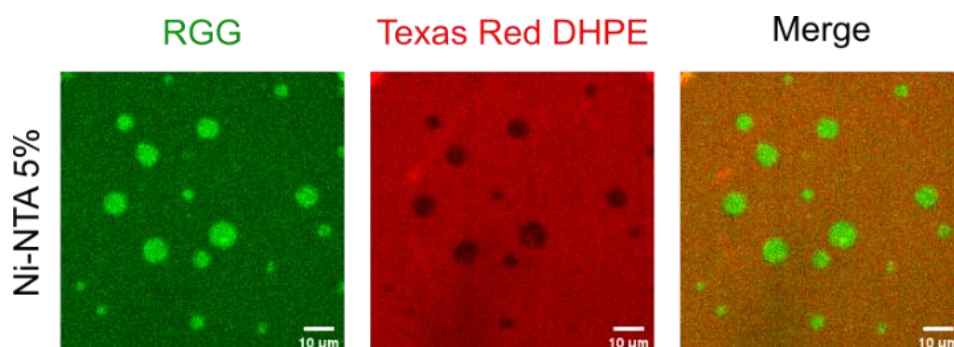

**Supplementary Figure 6. Lipid probe exclusion from protein-rich regions with low DGS-Ni-NTA concentration in the membrane.** Membrane composition: 95 mol% DOPC, 5 mol% DGS-Ni-NTA with 0.5 mol% Texas Red DHPE. Buffer: 25 mM HEPES, 100 mM NaCl, pH 7.4. 1  $\mu$ M of his-RGG labeled with Atto 488 was used. Scale bar, 10  $\mu$ m.

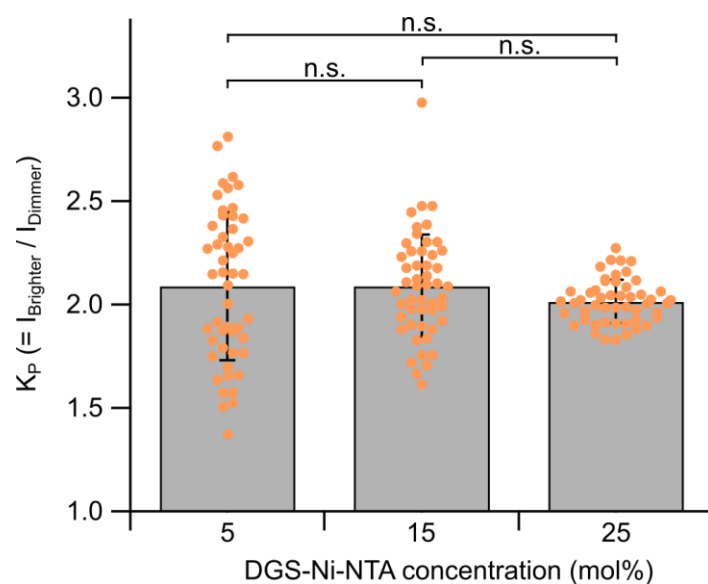

**Supplementary Figure 7. Partition coefficients ( $K_P$ ) of lipid probe as a function of DGS-Ni-NTA concentrations in the membrane.** Data are presented as mean values  $\pm$  SD ( $n = 50$ ). Membrane composition: 75-95 mol% DOPC, 5-25 mol% DGS-Ni-NTA with 0.5 mol% Texas Red DHPE. 1  $\mu$ M of unlabeled his-RGG was used. Brackets show statistically significant comparisons using an unpaired, two-tailed Student's t-test (n.s. indicates a difference that was not statistically significant).

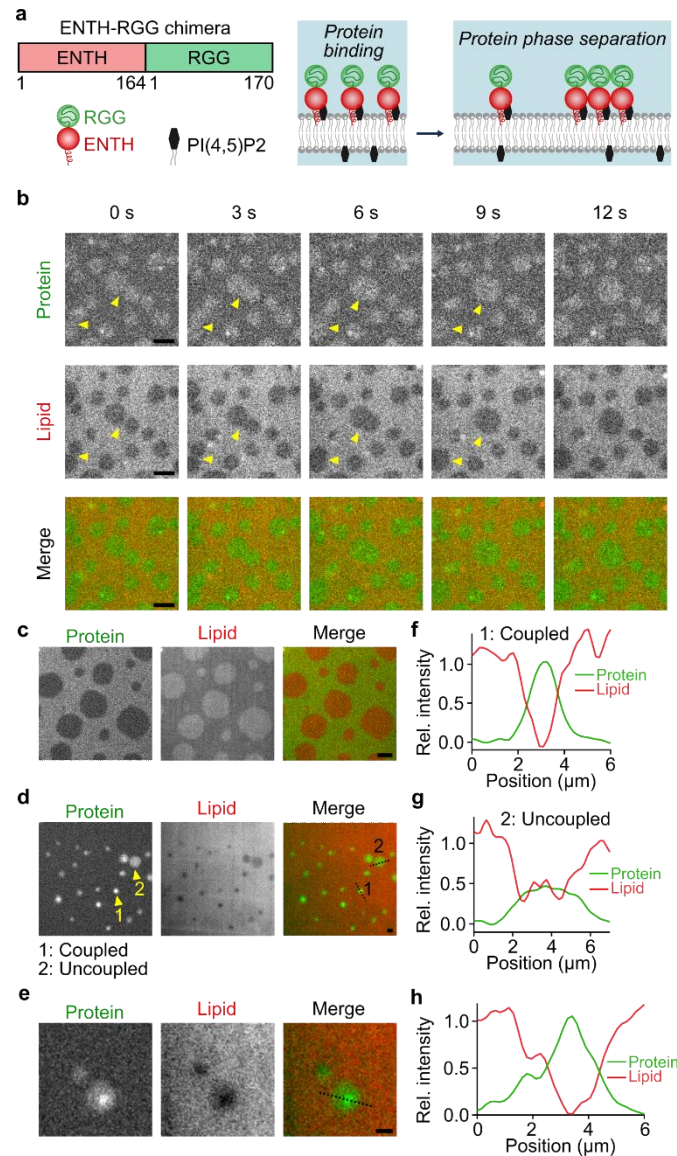

**Supplementary Figure 8. Phase separation of ENTH-RGG protein chimera on the membrane.** **a**, Schematic of recombinant protein chimera ENTH-RGG and its binding and phase separation on the membrane through interactions between ENTH domain and PI(4,5)P2 lipids. **b**, Images showing fusion of protein-rich regions. Yellow arrowheads indicate fusion spots. Scale bars, 10  $\mu\text{m}$ . **c**, Images for the case where the protein-rich phase is the continuous phase, and the protein-depleted phase is the dispersed phase (described as Case 3 in the main text). Scale bar, 2  $\mu\text{m}$ . **d,e** Images showing coupled and uncoupled regions when protein access to both sides of the membrane was possible. Scale bars, 2  $\mu\text{m}$ . **f-h**, Relative intensity profile along the dotted line in the merged channel in **d** for coupled (**f**) and uncoupled (**g**) regions, and in the merged channel in **e** (**h**), where green and red lines represent the intensity from protein and lipid channels, respectively. 1  $\mu\text{M}$  of ENTH-RGG, labeled with Atto 488, was used. The same membrane composition (80 mol% DOPC, 15 mol% DOPS, 5 mol% PI(4,5)P2, and 0.5 mol% BODIPY TR Ceramide) and buffer (25 mM HEPES, 100 mM NaCl, pH 7.4) were used for all the panels.
